# Supplementary material for: Controlled rehabilitative and supportive care intervention trials in patients with high-grade gliomas and their caregivers: a systematic review
Source: PubMed Central journal article supplement — BMJ Support Palliat Care. 2014 Jun 2;6(1):27–34. doi: 10.1136/bmjspcare-2013-000593 (PMC4789693; doi:10.1136/bmjspcare-2013-000593), 2014-06-02
Supplement: bmjspcare-2013-000593-s1.pdf [file bmjspcare-2013-000593-s1.pdf]

Supplementary Table 1 Description of the studies

| Reference and country                             | Population, sample size and attrition | Median age (range)     | Study design, focus and time of enrollment                                                                                                                                     | Intervention, mode and setting                                                             | Duration, frequency, length and adherence                                  | Time for measurements and main results                                                                                                                                                                                                                                                             |
|---------------------------------------------------|---------------------------------------|------------------------|--------------------------------------------------------------------------------------------------------------------------------------------------------------------------------|--------------------------------------------------------------------------------------------|----------------------------------------------------------------------------|----------------------------------------------------------------------------------------------------------------------------------------------------------------------------------------------------------------------------------------------------------------------------------------------------|
| Hassler et al., 2010 <sup>22</sup><br><br>Austria | HGG (n=11)<br><br>Attrition 0%        | 50 years (range 23-73) | Clinical controlled pilot trial, single arm, no control group<br><br>Investigates the outcome on cognitive function<br><br>Enrollment 10-42 months (median 15) after diagnosis | Neuro-cognitive group training<br><br>Group + supervised<br><br>Setting: outpatient clinic | 1½ hour/1 day per week for 10 weeks<br><br>100% adherence and satisfaction | Pre- and post measurements<br><br>Verbal Memory Total Learning (HVLt total learning) ↑ (P=0.04)<br><br>Verbal Memory Delayed Recall ( HVLt recall) → (P=0.11)<br><br>Psychomotor speed (TMT-A) → (P=0.22)<br><br>Sustained attention (TMT-B) → (P =0.17)<br><br>Verbal fluency (COWAT) → (P =0.29) |
| Pace et.                                          | BT                                    | 60                     | Clinical                                                                                                                                                                       | Physical                                                                                   | 1 hour/ 3                                                                  | Pre- and post                                                                                                                                                                                                                                                                                      |

Supplementary Table 1 Description of the studies

|                        |                                                                                                                                                                         |                           |                                                                                                                                                                                                              |                                                                    |                                                                      |                                                                                                                                                                                                                                                                                                                                                                                                                                                                                 |
|------------------------|-------------------------------------------------------------------------------------------------------------------------------------------------------------------------|---------------------------|--------------------------------------------------------------------------------------------------------------------------------------------------------------------------------------------------------------|--------------------------------------------------------------------|----------------------------------------------------------------------|---------------------------------------------------------------------------------------------------------------------------------------------------------------------------------------------------------------------------------------------------------------------------------------------------------------------------------------------------------------------------------------------------------------------------------------------------------------------------------|
| al. 2007 <sup>23</sup> | (121);<br>62 with<br>HGG,<br>27 with<br>AA, 12<br>with<br>Oligode<br>n-<br>droglio<br>ma and<br>mixed<br>BT, 20<br>with<br>other<br>BT.<br>Attrition<br>not<br>reported | years<br>(range<br>14-79) | controlled<br>pilot trial,<br>single arm,<br>no control<br>group<br><br>Explores the<br>functional<br>outcome<br>and impact<br>on QOL<br><br>Enrollment:<br>82 after<br>diagnosis,<br>39 after<br>recurrence | training<br><br>Individual +<br>supervised<br><br>Setting:<br>home | days per<br>week for<br>12 weeks<br><br>Adherence<br>not<br>reported | measurements<br><br>BI: An increased<br>tendency in 39%, a<br>stable tendency in<br>16%, and decreased<br>tendency in 44% (no <i>P</i><br>value)<br><br>A tendency for<br>increased KPS in 24%<br>(no <i>P</i> value)<br><br>Among a selected<br>group of clinical<br>improved patients:<br>Median BI↑ ( <i>P</i> =0.001)<br>and Median KPS ↑ ( <i>P</i> =<br>0.001)<br><br>No differences in<br>functional gain<br>between the<br>histological subgroup<br>(no <i>P</i> value) |
|------------------------|-------------------------------------------------------------------------------------------------------------------------------------------------------------------------|---------------------------|--------------------------------------------------------------------------------------------------------------------------------------------------------------------------------------------------------------|--------------------------------------------------------------------|----------------------------------------------------------------------|---------------------------------------------------------------------------------------------------------------------------------------------------------------------------------------------------------------------------------------------------------------------------------------------------------------------------------------------------------------------------------------------------------------------------------------------------------------------------------|

Supplementary Table 1 Description of the studies

|                                                               |                                                                           |                                                                                                              |                                                                                                                                                                    |                                                                                                                     |                                                                                                                                                      |                                                                                                                                                                                                                                                                                  |
|---------------------------------------------------------------|---------------------------------------------------------------------------|--------------------------------------------------------------------------------------------------------------|--------------------------------------------------------------------------------------------------------------------------------------------------------------------|---------------------------------------------------------------------------------------------------------------------|------------------------------------------------------------------------------------------------------------------------------------------------------|----------------------------------------------------------------------------------------------------------------------------------------------------------------------------------------------------------------------------------------------------------------------------------|
|                                                               |                                                                           |                                                                                                              |                                                                                                                                                                    |                                                                                                                     |                                                                                                                                                      | A functional gain was observed in 26% of the patients with HGG (not specified)<br>72% had an improvement in at least one domain scores compared with their baseline QOL score (n=54)                                                                                             |
| Geler-<br>Kulcu et<br>al. 2008<br><sup>24</sup><br><br>Turkey | BT<br>(n=21);<br>9 with<br>HGG<br>Stroke<br>(n=21)<br><br>Attrition<br>0% | BT<br>group:<br>52.5<br>(range<br>36.5-<br>68.5)<br><br>Stroke<br>group:<br>56.7<br>(range<br>45.7-<br>67.7) | Clinical<br>controlled<br>and<br>comparative<br>trial, single<br>arm, two<br>groups<br>matched<br>according to<br>lesion side<br><br>Examines<br>the<br>functional | Physical<br>training<br>+<br>Occupation<br>al therapy<br><br>Individual +<br>supervised<br><br>Setting:<br>hospital | 1 hour/5<br>days per<br>week for<br>5.7- 18.7<br>weeks<br><br>Mean<br>number of<br>sessions:<br>BT group<br>11.5± 5.8<br>Stroke<br>group<br>12.3±6.4 | Pre- and post<br>measurements<br><br>Both the BT group and<br>the stroke group<br>improved significantly:<br><br>MAS ↑ ( $P=0.025/ P =$<br>$0.002$ ) between groups<br>( $P=0.718$ )<br>PASS ↑ ( $P=0.002/$<br>$P=0.002$ ) between<br>groups ( $P=0.817$ )<br>BBS ↑ ( $P=0.011/$ |

Supplementary Table 1 Description of the studies

|                                   |                                            |                                  |                                                                                                               |                                                            |                                   |                                                                                                                                                                                                                                                                                     |
|-----------------------------------|--------------------------------------------|----------------------------------|---------------------------------------------------------------------------------------------------------------|------------------------------------------------------------|-----------------------------------|-------------------------------------------------------------------------------------------------------------------------------------------------------------------------------------------------------------------------------------------------------------------------------------|
|                                   |                                            |                                  | outcomes                                                                                                      |                                                            |                                   | <p><math>P=0.109</math>) between groups (<math>P=0.109</math>)</p> <p>FIM mobility ↑ (<math>P=0.043/ P=0.007</math>) between groups (<math>P=0.660</math>)</p> <p>There was no statistically significant difference between the two groups in any of the four outcome measures.</p> |
| Bartolo et al. 2012 <sup>25</sup> | BT (n=75); 43 with HGG, 32 with meningioma | BT group: 63.5 (range 50.3-76.7) | A case-controlled and comparative trial, single arm, two groups matched one-to-one, for age, sex, and side of | Individual + supervised Physical training + speech therapy | 1 hour/ 6 days a week for 4 weeks | Pre- and post measurements FIM, Sitting Balance, Standing balance, Hauser Index and MGHFAC ↑ for both groups ( $P<0.001$ )                                                                                                                                                          |
| Italy                             | Stroke (n=75) Attrition                    | HGG group: 62 (range             |                                                                                                               | Setting: Hospital                                          | 100% adherence                    | Patients with meningioma achieved                                                                                                                                                                                                                                                   |

Supplementary Table 1 Description of the studies

|                                              |                                                                          |                                                        |                                                                                                                                  |                                                                                                                                              |                                                                                                                            |                                                                                                                                                                                                                                                                                        |
|----------------------------------------------|--------------------------------------------------------------------------|--------------------------------------------------------|----------------------------------------------------------------------------------------------------------------------------------|----------------------------------------------------------------------------------------------------------------------------------------------|----------------------------------------------------------------------------------------------------------------------------|----------------------------------------------------------------------------------------------------------------------------------------------------------------------------------------------------------------------------------------------------------------------------------------|
|                                              | 0%                                                                       | 48.1-75.9)<br><br>Stroke group: 65.7 (range 55.1-76.3) | lesion<br><br>Tests the functional outcomes<br><br>Enrollment after surgery                                                      |                                                                                                                                              |                                                                                                                            | better results in regards to independence in activities of daily living ( $P=0.02$ ) and mobility ( $P=0.04$ ) compared with HGG or stroke.                                                                                                                                            |
| Sardell et al., 2000 <sup>26</sup><br><br>UK | BT (N=45); 43 with HGG, 1 with PNET, 1 with OA<br><br>Attrition: unclear | 50 years (range 23-69)                                 | A quantitative pilot evaluation study<br><br>Measures the numbers of unscheduled outpatient visits, BI, and patient satisfaction | Individual + supervised<br><br>Psycho-social and supportive intervention with telephone follow-up in a nurse-led telephone follow-up clinic. | 1 telephone consultation/month for 3 months + face-to-face consultation in the clinic on the fourth month.<br><br>Patients | Unscheduled clinic visits and BI: pre and post measurements<br><br>Satisfaction questionnaire completed at the fourth month or later (n=22)<br><br>Unscheduled clinic visits= 41. Thirty-one were due to disease progression and were usually initiated by the nurse after a NTF call. |

Supplementary Table 1 Description of the studies

|  |  |  |                                                             |                                                    |                                                                                                                                                     |                                                                                                                                                                                                                                                                                                                                                                                                                                                                                                                                                               |
|--|--|--|-------------------------------------------------------------|----------------------------------------------------|-----------------------------------------------------------------------------------------------------------------------------------------------------|---------------------------------------------------------------------------------------------------------------------------------------------------------------------------------------------------------------------------------------------------------------------------------------------------------------------------------------------------------------------------------------------------------------------------------------------------------------------------------------------------------------------------------------------------------------|
|  |  |  | (n=22)<br><br>Enrollment<br>16 months<br>after<br>diagnosis | Setting:<br><br>Combined<br>home and<br>outpatient | could<br><br>choose to<br>continue<br>with NTF<br>hereafter<br><br>Adherence<br>: 80% after<br>4 month,<br>45% at 8<br>months,<br>34% at 1<br>year. | The other 10 visits<br>were due to concern<br>regarding symptoms.<br><br>The number of<br>unscheduled clinic<br>visits would not have<br>been avoided with<br>CCF carried out at the<br>same time intervals.<br><br>BI at baseline: 43<br>patients reported<br>normal or near normal<br>function. On<br>subsequent follow-up<br>(n=11) and time not<br>specified – 5 patients<br>had an improvement,<br>six had a reduction,<br>one patient was not<br>assessed (no <i>P</i> -value)<br><br>Patient satisfaction:<br>81% strongly agree<br>and 19% agree that |
|--|--|--|-------------------------------------------------------------|----------------------------------------------------|-----------------------------------------------------------------------------------------------------------------------------------------------------|---------------------------------------------------------------------------------------------------------------------------------------------------------------------------------------------------------------------------------------------------------------------------------------------------------------------------------------------------------------------------------------------------------------------------------------------------------------------------------------------------------------------------------------------------------------|

Supplementary Table 1 Description of the studies

|                                            |                                                                     |                                                                   |                                                                                                                                                                |                                                                                                                                                 |                                                                                     |                                                                                                                                                                                                                                                                                                             |
|--------------------------------------------|---------------------------------------------------------------------|-------------------------------------------------------------------|----------------------------------------------------------------------------------------------------------------------------------------------------------------|-------------------------------------------------------------------------------------------------------------------------------------------------|-------------------------------------------------------------------------------------|-------------------------------------------------------------------------------------------------------------------------------------------------------------------------------------------------------------------------------------------------------------------------------------------------------------|
|                                            |                                                                     |                                                                   |                                                                                                                                                                |                                                                                                                                                 |                                                                                     | the follow up allows the patient to get on with their life and make better use of their time. Median patient satisfaction score of 9 on a visual analogue scale of 0-10 (range 3.6-10)                                                                                                                      |
| Spetz et al., 2005 <sup>27</sup><br>Sweden | HGG (n=16)<br>Caregivers (n=16);<br>10 spouses<br><br>Attrition: 0% | Patients: 50.8 (range from 21-71)<br><br>Caregivers: not reported | A qualitative descriptive intervention study<br><br>Explores the patients' and their families' perspective on the function, relationship and their use of a SN | Individual + supervised<br><br>Psycho-social and supportive intervention with a SN<br><br>function<br><br>Setting: Combined home and outpatient | Ongoing telephone contact with a SN during the entire course.<br><br>100% adherence | Field notes and conversations were written during the entire course of the disease. Interviews with patients and their families every third month. The spouses were interviewed after the patient's death<br><br>Four relationships between the family and the SN were identified:<br>1) a resource for the |

Supplementary Table 1 Description of the studies

|                                                      |                                                                                                                                           |                                                                           |                                                                                                                                                                                                                                                  |                                                                  |                                                                  |                                                                                                                                                                                                                                                                                                                                                                                                             |
|------------------------------------------------------|-------------------------------------------------------------------------------------------------------------------------------------------|---------------------------------------------------------------------------|--------------------------------------------------------------------------------------------------------------------------------------------------------------------------------------------------------------------------------------------------|------------------------------------------------------------------|------------------------------------------------------------------|-------------------------------------------------------------------------------------------------------------------------------------------------------------------------------------------------------------------------------------------------------------------------------------------------------------------------------------------------------------------------------------------------------------|
|                                                      |                                                                                                                                           |                                                                           | function<br><br>Enrollment<br>at time of<br>diagnosis                                                                                                                                                                                            |                                                                  |                                                                  | family 2) a parallel<br>resource within the<br>family 3) a resource for<br>the caregiver 4) a<br>resource for the patient                                                                                                                                                                                                                                                                                   |
| Spetz et<br>al.,<br>2008 <sup>28</sup><br><br>Sweden | HGG<br>patients<br>(n=16)<br><br>Caregivers<br>(n=16)<br><br>Attrition:<br>0%<br><br>Attrition<br>from the<br>last<br>interview:<br>12.5% | Same<br>study<br>as<br>described<br>in<br>Spetz,<br>2005<br><sup>26</sup> | A qualitative<br>descriptive<br>intervention<br>study<br><br>Explores<br>how the<br>caregivers<br>utilized the<br>SN function<br>and the<br>relationship<br>between the<br>SN and the<br>caregivers<br><br>Enrollment<br>at time of<br>diagnosis | Same study<br>as<br>described in<br>Spetz, 2005<br><sup>26</sup> | Same<br>study as<br>described<br>in Spetz,<br>2005 <sup>26</sup> | Field notes and<br>conversations were<br>written during the<br>entire course of the<br>disease. Interviews<br>with patients and their<br>families every third<br>month. The spouses<br>were interviewed after<br>the patient's death<br><br>Mean number of total<br>contacts= 32 (range 1-<br>115)<br><br>Three main categories<br>of subjects discussed<br>with the SN were: 1)<br>Subjects related to the |



Supplementary Table 1 Description of the studies

|                                  |                                        |                             |                                                            |                                             |                                                    |                                                                                                                                                                                                                                                                                                                                                                          |
|----------------------------------|----------------------------------------|-----------------------------|------------------------------------------------------------|---------------------------------------------|----------------------------------------------------|--------------------------------------------------------------------------------------------------------------------------------------------------------------------------------------------------------------------------------------------------------------------------------------------------------------------------------------------------------------------------|
|                                  |                                        |                             |                                                            |                                             |                                                    | <p>sick partner's medical health and treatment</p> <p>2) Subjects related to needs and desires concerning one-self 3) Subjects related to the relationship with the SN</p> <p>Close relationships between the SN and the caregivers were identified as reducing the caregivers' feeling of being left alone with the responsibility, and assisted adequate decisions</p> |
| Boele et al., 2011 <sup>29</sup> | IG: caregivers (n=31)<br>CG: caregiver | IG: 50.77 (range 39.3-62.2) | A cross-sectional randomized controlled intervention trial | Individual+ supervised<br>Psycho-social and | IG: 1 hour/1 day per week for 6 weeks<br>CG: Usual | <p>Four questionnaires at baseline and every 2 months, five times in total</p> <p>Patients increased</p>                                                                                                                                                                                                                                                                 |

Supplementary Table 1 Description of the studies

|                    |                                                                            |                                                       |                                                                                                                                                                                                                   |                                                                    |                                                                                                              |                                                                                                                                                                                                                                                                                                                                                                                                                                                                                                                                                                                     |
|--------------------|----------------------------------------------------------------------------|-------------------------------------------------------|-------------------------------------------------------------------------------------------------------------------------------------------------------------------------------------------------------------------|--------------------------------------------------------------------|--------------------------------------------------------------------------------------------------------------|-------------------------------------------------------------------------------------------------------------------------------------------------------------------------------------------------------------------------------------------------------------------------------------------------------------------------------------------------------------------------------------------------------------------------------------------------------------------------------------------------------------------------------------------------------------------------------------|
| <p>Netherlands</p> | <p>rs<br/>(n=25)<br/><br/>Attrition:<br/>IG:<br/>51.6%<br/>CG:<br/>32%</p> | <p>CG:<br/>50.56<br/>(range<br/>40.2 -<br/>60.92)</p> | <p>Investigates<br/>the outcome<br/>on QOL and<br/>feeling of<br/>mastery of<br/>caregivers<br/><br/>Enrollment<br/>≥12 months<br/>from<br/>diagnosis<br/>(n=24) ≤12<br/>months from<br/>diagnosis<br/>(n=32)</p> | <p>educational<br/>intervention<br/><br/>Setting:<br/>Hospital</p> | <p>care e.g.<br/>interaction<br/>s with<br/>specialists<br/><br/>Adherence<br/>:<br/>IG:48.4%<br/>CG:68%</p> | <p>uncertainty concerning<br/>the future and<br/>increments in<br/>communication deficits<br/>were negatively<br/>associated with mental<br/>functioning of the<br/>caregiver (<math>P=0.004</math><br/>and <math>P=0.043</math>,<br/>respectively)<br/><br/>Caregiver mastery was<br/>positively related to<br/>patient's visual<br/>disorders (<math>P=0.031</math>) +<br/>communication deficits<br/>(<math>P=0.005</math>)<br/><br/>Caregiver mastery<br/>delta scores<br/>(assessment at test<br/>time 5 minus baseline<br/>assessment) differed<br/>significantly between</p> |
|--------------------|----------------------------------------------------------------------------|-------------------------------------------------------|-------------------------------------------------------------------------------------------------------------------------------------------------------------------------------------------------------------------|--------------------------------------------------------------------|--------------------------------------------------------------------------------------------------------------|-------------------------------------------------------------------------------------------------------------------------------------------------------------------------------------------------------------------------------------------------------------------------------------------------------------------------------------------------------------------------------------------------------------------------------------------------------------------------------------------------------------------------------------------------------------------------------------|

Supplementary Table 1 Description of the studies

|                                        |                                                                                                      |                     |                                                                                                                                                                                                                        |                                                                                                                             |                                                                               |                                                                                                                                                                                                                                                                                                                                                                                                                      |
|----------------------------------------|------------------------------------------------------------------------------------------------------|---------------------|------------------------------------------------------------------------------------------------------------------------------------------------------------------------------------------------------------------------|-----------------------------------------------------------------------------------------------------------------------------|-------------------------------------------------------------------------------|----------------------------------------------------------------------------------------------------------------------------------------------------------------------------------------------------------------------------------------------------------------------------------------------------------------------------------------------------------------------------------------------------------------------|
|                                        |                                                                                                      |                     |                                                                                                                                                                                                                        |                                                                                                                             |                                                                               | the two groups<br>( $P=0.008$ ) showing that<br>the IG's feelings of<br>mastery increased<br>( $P=0.021$ )                                                                                                                                                                                                                                                                                                           |
| Keir,<br>2011 <sup>30</sup><br><br>USA | HGG<br>(n=26)<br>with<br>KPS of<br>$\geq 70$ .<br><br>Attrition:<br>one<br>patient<br>dropped<br>out | Not<br>reporte<br>d | A<br>prospective,<br>single-arm<br>intervention<br>pilot study,<br>no control<br>group<br><br>Assesses<br>the patient<br>reported<br>psychologic<br>al<br>outcomes,<br>level of<br>stress and<br>QOL<br><br>Enrollment | Individual+<br>supervised<br><br>Massage<br>therapy<br><br>Setting: A<br>outpatient<br>clinic related<br>to the<br>Hospital | 45<br>minutes/2<br>days per<br>week for 4<br>weeks<br><br>Adherence<br>:96.2% | Measurements at<br>baseline, after week<br>1,2,3, and 4 and 1<br>week after last<br>massage session<br>(week 5)<br>Levels of stress ↓<br>between week 2 and 3<br>( $P=0.010$ )<br>A tendency for<br>reduction in stress<br>continued throughout<br>week 4 ( $P=0.063$ )<br>FACT-Br at week 4:<br>Emotional well-being ↑<br>( $P\leq 0.001$ )<br>Additional BT concerns<br>↑ ( $P\leq 0.013$ )<br>Social/family well- |

Supplementary Table 1 Description of the studies

|  |  |  |                    |  |  |                                                                                                                                                                                                                         |
|--|--|--|--------------------|--|--|-------------------------------------------------------------------------------------------------------------------------------------------------------------------------------------------------------------------------|
|  |  |  | after<br>diagnosis |  |  | being ↑ ( $P \leq 0.024$ )<br><br>A trend for<br>improvement in<br>physical well-being<br>( $P \leq 0.078$ )<br><br>At the end of week 4,<br>PSS-10 scores of all<br>participants were<br>below the stress<br>threshold |
|--|--|--|--------------------|--|--|-------------------------------------------------------------------------------------------------------------------------------------------------------------------------------------------------------------------------|

Abbreviations: HGG, Patients diagnosed with a high-grade glioma; KPS, Karnofsky Performance Score; AA, Anaplastic Astrocytoma; BT, Brain tumor; TMT-B, Trail Making Test B; TMT-A, Trail Making Test A; COWAT, Controlled Oral Word Association Test; BI, Barthel Index used to measure Activities of Daily Living; MAS, Motor Assessment Scale; PASS, Postural Assessment Scale for Stroke; BBS, Berg Balance Scale; FIM, Functional Impairment Measurement; MGHFAC, Massachusetts General Hospital Functional Ambulation Classification; PNET, Primitive neuroectodermal tumor; OA, Oligoastrocytoma; SN, Specialist Nurse; NTF, Nurse-led Telephone Follow-up; CCF, Conventional Clinic Follow-up; PSS-10, Perceived Stress Scale; FACT-Br, Functional Assessment of Cancer Therapy-Brain; IG, Intervention group; CG, Control group; QOL, Quality of life; →, No change; ↑, Significant increased change; ↓, Significant decreased change.
